# Supplementary material for: Physiologically relevant aspirin concentrations trigger immunostimulatory cytokine production by human leukocytes
Source: PLoS One. 2021 Aug 24;16(8):e0254606. doi: 10.1371/journal.pone.0254606 (PMC8384208; doi:10.1371/journal.pone.0254606)
Supplement: S5 Table — (XLSX) [file pone.0254606.s006.xlsx]

## Sheet: S5 Table
Donor 1	PGE2 (pg/ml)			Donor 2	PGE2 (pg/ml)			Donor 3	PGE2 (pg/ml)			Donor 4	PGE2 (pg/ml)
	Mean	SD			Mean	SD			Mean	SD			Mean	SD
Unstimulated	47.3715	24.6955		Unstimulated	129.289	7.27262		Unstimulated	16.0552	3.88688		Unstimulated	169.649	14.6677
Pam3CsK4	1694.46	312.983		Pam3CsK4	2283.14	241.941		Pam3CsK4	401.963	126.258		Pam3CsK4	379.149	56.8872
HKLM	3247.85	380.107		HKLM	3350.4	293.934		HKLM	3473.95	316.796		HKLM	3412.67	265.429
LPS	602.788	242.096		LPS	3294.29	623.181		LPS	1094.3	110.553		LPS	1241.39	193.061
Flagellin	1287.68	328.718		Flagellin	3044.58	389.178		Flagellin	1300.42	95.7585		Flagellin	1799.14	326.638
ssRNA40	209.86	31.6444		ssRNA40	2181.71	335.967		ssRNA40	1481.84	132.457		ssRNA40	2411.51	405.342
Donor 1	PGE2 (pg/ml)			Donor 2	PGE2 (pg/ml)			Donor 3	PGE2 (pg/ml)			Donor 4	PGE2 (pg/ml)
	Mean	SD			Mean	SD			Mean	SD			Mean	SD
Pam3CsK4	1694.46	312.983		Pam3CsK4	2283.14	241.941		Pam3CsK4	401.963	126.258		Pam3CsK4	379.149	56.8872
+0.005mg/ml ASA	663.669	42.2492		+0.005mg/ml ASA	910.116	48.088		+0.005mg/ml ASA	254.393	23.9526		+0.005mg/ml ASA	272.773	22.6004
+0.02mg/ml ASA	1083.29	16.8703		+0.02mg/ml ASA	1608.79	13.176		+0.02mg/ml ASA	290.322	31.2353		+0.02mg/ml ASA	230.803	15.543
+0.2mg/ml ASA	1116.24	183.968		+0.2mg/ml ASA	1857.21	304.821		+0.2mg/ml ASA	280.287	14.1994		+0.2mg/ml ASA	375.841	162.028
HKLM	3247.85	380.107		HKLM	3350.4	293.934		HKLM	3473.95	316.796		HKLM	3412.67	265.429
+0.005mg/ml ASA	1404.8	138.554		+0.005mg/ml ASA	1367.5	80.7627		+0.005mg/ml ASA	1732.74	100.933		+0.005mg/ml ASA	1549.78	59.4863
+0.02mg/ml ASA	3033.79	79.8535		+0.02mg/ml ASA	2993.82	236.506		+0.02mg/ml ASA	3751.4	594.072		+0.02mg/ml ASA	3232.61	219.405
+0.2mg/ml ASA	3314.27	295.316		+0.2mg/ml ASA	3148.47	183.504		+0.2mg/ml ASA	4061.63	660.193		+0.2mg/ml ASA	3541.08	312.237
LPS	602.788	242.096		LPS	3294.29	623.181		LPS	1094.3	110.553		LPS	1241.39	193.061
+0.005mg/ml ASA	297.398	12.7593		+0.005mg/ml ASA	1169.39	276.917		+0.005mg/ml ASA	621.227	59.7829		+0.005mg/ml ASA	634.388	50.4624
+0.02mg/ml ASA	194.828	2.39566		+0.02mg/ml ASA	2788.73	325.552		+0.02mg/ml ASA	696.737	69.8529		+0.02mg/ml ASA	787.892	89.1373
+0.2mg/ml ASA	227.438	114.041		+0.2mg/ml ASA	3047.07	594.087		+0.2mg/ml ASA	815.352	248.715		+0.2mg/ml ASA	811.318	192.499
Flagellin	1287.68	328.718		Flagellin	3044.58	389.178		Flagellin	1300.42	95.7585		Flagellin	1799.14	326.638
+0.005mg/ml ASA	483.595	12.8513		+0.005mg/ml ASA	1287.34	204.653		+0.005mg/ml ASA	732.557	44.0374		+0.005mg/ml ASA	800.235	46.0401
+0.02mg/ml ASA	669.161	48.8763		+0.02mg/ml ASA	2486.16	161.375		+0.02mg/ml ASA	831.842	99.6563		+0.02mg/ml ASA	1081.47	61.0377
+0.2mg/ml ASA	680.994	157.165		+0.2mg/ml ASA	2627.2	340.118		+0.2mg/ml ASA	921.471	346.016		+0.2mg/ml ASA	1262.93	254.88
ssRNA40	209.86	31.6444		ssRNA40	2181.71	335.967		ssRNA40	1481.84	132.457		ssRNA40	2411.51	405.342
+0.005mg/ml ASA	349.466	40.8507		+0.005mg/ml ASA	1125.58	123.075		+0.005mg/ml ASA	615.715	1.86027		+0.005mg/ml ASA	1120.79	62.628
+0.02mg/ml ASA	216.825	36.6639		+0.02mg/ml ASA	2001.81	148.194		+0.02mg/ml ASA	1007.97	173.639		+0.02mg/ml ASA	2268.62	185.83
+0.2mg/ml ASA	123.895	5.49199		+0.2mg/ml ASA	2111.82	214.908		+0.2mg/ml ASA	1057.7	122.967		+0.2mg/ml ASA	2070.15	50.1612
Donor 1	PGE2 (pg/ml)			Donor 2	PGE2 (pg/ml)			Donor 3	PGE2 (pg/ml)			Donor 4	PGE2 (pg/ml)
	Mean	SD			Mean	SD			Mean	SD			Mean	SD
Pam3CsK4	43.0408	21.9071		Pam3CsK4	97.2928	58.5787		Pam3CsK4	412.713	187.837		Pam3CsK4	198.193	36.2889
+0.01mg/ml IND	9.25525	0.159568		+0.01mg/ml IND	13.2811	1.44254		+0.01mg/ml IND	28.7789	1.70409		+0.01mg/ml IND	35.6559	2.86792
+0.05mg/ml IND	7.68734	1.65855		+0.05mg/ml IND	10.1861	0.683409		+0.05mg/ml IND	29.7483	1.84297		+0.05mg/ml IND	36.1895	4.57511
+0.01mg/ml CCXB	12.3662	1.45542		+0.01mg/ml CCXB	16.1839	0.39694		+0.01mg/ml CCXB	28.3553	4.06176		+0.01mg/ml CCXB	35.4157	3.70026
+0.05mg/ml CCXB	10.7288	2.75971		+0.05mg/ml CCXB	13.8139	2.24885		+0.05mg/ml CCXB	24.0287	0.905966		+0.05mg/ml CCXB	31.5353	0.185783
HKLM	3044.95	515.374		HKLM	2605.6	74.1898		HKLM	1149.85	98.837		HKLM	1470.15	152.844
+0.01mg/ml IND	8.78975	0.217076		+0.01mg/ml IND	33.2334	16.2858		+0.01mg/ml IND	32.466	1.96359		+0.01mg/ml IND	46.332	5.8859
+0.05mg/ml IND	4.83181	0.129292		+0.05mg/ml IND	13.3974	0.19304		+0.05mg/ml IND	32.2156	3.61321		+0.05mg/ml IND	90.1486	26.0388
+0.01mg/ml CCXB	431.281	66.8728		+0.01mg/ml CCXB	117.623	16.3401		+0.01mg/ml CCXB	27.7539	2.89339		+0.01mg/ml CCXB	34.2444	2.23411
+0.05mg/ml CCXB	13.3154	1.33611		+0.05mg/ml CCXB	17.6272	1.57015		+0.05mg/ml CCXB	27.0532	2.82677		+0.05mg/ml CCXB	25.4611	2.22478
LPS	44.371	13.0634		LPS	50.8345	2.75798		LPS	147.554	35.9612		LPS	180.667	39.6106
+0.01mg/ml IND	8.24313	0.154964		+0.01mg/ml IND	12.724	0.254829		+0.01mg/ml IND	24.0098	0.070568		+0.01mg/ml IND	33.1322	1.02145
+0.05mg/ml IND	7.18509	0.245263		+0.05mg/ml IND	8.94089	0.592813		+0.05mg/ml IND	31.1888	0.862332		+0.05mg/ml IND	29.076	1.80769
+0.01mg/ml CCXB	8.76543	0.890111		+0.01mg/ml CCXB	15.4608	2.26316		+0.01mg/ml CCXB	27.9916	1.23573		+0.01mg/ml CCXB	29.8592	0.663764
+0.05mg/ml CCXB	7.39353	1.96074		+0.05mg/ml CCXB	13.4938	2.19862		+0.05mg/ml CCXB	23.8335	2.504		+0.05mg/ml CCXB	27.8259	2.46987
Flagellin	184.26	80.7804		Flagellin	901.832	347.546		Flagellin	262.454	1.89305		Flagellin	240.096	13.6193
+0.01mg/ml IND	13.1277	2.47755		+0.01mg/ml IND	13.3247	0.0255005		+0.01mg/ml IND	32.6642	9.4852		+0.01mg/ml IND	37.8539	5.1386
+0.05mg/ml IND	5.86482	1.71897		+0.05mg/ml IND	11.2948	1.75291		+0.05mg/ml IND	30.205	0.465348		+0.05mg/ml IND	33.2153	0.0720563
+0.01mg/ml CCXB	15.0485	0.589052		+0.01mg/ml CCXB	22.6687	4.3261		+0.01mg/ml CCXB	32.4444	2.35501		+0.01mg/ml CCXB	29.8592	0.663764
+0.05mg/ml CCXB	9.32792	1.80763		+0.05mg/ml CCXB	15.4405	0.773408		+0.05mg/ml CCXB	23.4598	0.730727		+0.05mg/ml CCXB	26.8186	2.31772
ssRNA40	34.6441	3.64636		ssRNA40	90.2377	1.89345		ssRNA40	35.3507	6.63878		ssRNA40	38.1116	1.91068
+0.01mg/ml IND	7.67916	0.674109		+0.01mg/ml IND	13.4319	0.787152		+0.01mg/ml IND	25.396	1.48806		+0.01mg/ml IND	36.792	3.29317
+0.05mg/ml IND	6.31344	1.839		+0.05mg/ml IND	11.5381	0.183085		+0.05mg/ml IND	24.291	1.51562		+0.05mg/ml IND	39.4517	6.87712
+0.01mg/ml CCXB	7.69411	5.37614		+0.01mg/ml CCXB	16.4898	1.5659		+0.01mg/ml CCXB	28.8736	2.22083		+0.01mg/ml CCXB	36.7631	8.95466
+0.05mg/ml CCXB	11.6315	5.72227		+0.05mg/ml CCXB	14.2689	0.430061		+0.05mg/ml CCXB	19.077	3.36461		+0.05mg/ml CCXB	26.1266	2.2519
